# Supplementary material for: Reviews in Educational Psychology (Frontiers in Psychology 2010–2024): typology, topics, regional comparative and methodology toward digital and AI approaches
Source: Front Psychol. 2025 Apr 30;16:1588242. doi: 10.3389/fpsyg.2025.1588242 (PMC12257778; doi:10.3389/fpsyg.2025.1588242)
Supplement: SUPPLEMENTARY TABLE S3 — Analysis of articles split into two sheets: systematic review and meta-analyses. [file Table_3.xlsx]

## Sheet: Meta-analysis
Study	Year	Country	Study Type	N	Age	Constructs	Topic	Fidelity (Study type)	Validation	Period	Quality	Software	Methodology	Data Analysis
Amlashi et al. (2024)	2024	Germany	Meta-Analysis	26 studies	Mixed	Acculturation, mental health	Developmental Psychology	Empirical researches	PRISMA	1980-2020	Agency for Research and Healthcare Quality Scale (AHRQ)	Comprehensive Meta-Analysis	Meta-analysis PRISMA	Qualitative and Quantitative
Andersen et al. (2023)	2023	Norway	Meta-Analysis	53 studies	Adults	Workaholism, addiction	Social Psychology	Empirical researches	PRISMA/PROSPERO	up to 2023	Hoy et al. (2012)	Comprehensive Meta-Analysis	Meta-analysis PRISMA	Qualitative and Quantitative
Asperholm et al. (2020)	2020	Sweden	Meta-Analysis	535 studies	Mixed	Episodic memory	Clinical Psychology	Empirical researches	Not specific	1973-2013	Not specific	R	Meta-analysis	Qualitative and Quantitative
Björk et al. (2021)	2021	Finland, Sweden	Meta-Analysis	24 studies	Adults	Work engagement	Social Psychology	Empirical researches	PRISMA/PICOS	2000-2020	NICE	RevMan	Meta-analysis PRISMA	Qualitative and Quantitative
Bolton et al. (2023)	2023	Australia	Meta-Analysis	17 studies	Children	Internalizing problems	Developmental Psychology	Empirical researches	PRISMA/PROSPERO	2000-2021	Cochrane	MAJOR	Meta-analysis PRISMA	Qualitative and Quantitative
Caetano et al. (2023)	2023	Portugal	Meta-Analysis	18 studies	Adults	False Memory, Substance Abuse	Cognitive Psychology	Empirical researches	PRISMA/PICO/PROSPERO	1989-2021	Cochrane	Review Manager 5.4.1.	Meta-analysis PRISMA	Qualitative and Quantitative
Cao et al. (2020)	2020	China	Meta-Analysis	36 studies	Children	Computational training	Clinical Psychology	Empirical researches	PRISMA	1950 - 2020	PRISMA guidelines	Comprehensive Meta-Analysis	Meta-analysis PRISMA	Quantitative
Carrus et al. (2021)	2021	Germany, Italy, Norway	Meta-Analysis	102 studies	Adults	Pro-environmental behavior	Social Psychology	Empirical researches	PRISMA	2007-2017	PRISMA guidelines	Comprehensive Meta-Analysis	Meta-analysis PRISMA	Quantitative
Chen & Yu (2022)	2022	China	Meta-Analysis	86 studies	Youth	Social-Emotional Learning, Emotional Competence	Educational Psychology	Empirical researches	Not specific	Up to 2022	Not specific	Not specific	Meta-Analysis	Quantitative
Chen (2022)	2022	China	Meta-Analysis	16 studies	Adults	Self-regulation, academic achievement	Educational Psychology	Empirical researches	PRISMA	Not specific	PRISMA guidelines	Comprehensive Meta-Analysis	Meta-analysis PRISMA	Qualitative and Quantitative
Chen et al. (2020)	2020	Germany	Meta-Analysis	42 studies	Adults	Physical activity, positive affect	Health Psychology	Empirical researches	PRISMA	Up to 2020	Stone et al. (2019)	R	Meta-analysis PRISMA	Qualitative and Quantitative
Chen et al. (2024)	2024	China	Meta-Analysis	59 studies	Youth	Mental health, digital impact	Clinical Psychology	Empirical researches	PRISMA/INPLASY	2013-2023	Lacey and Matheson (2011)	Comprehensive Meta-Analysis	Meta-analysis PRISMA	Qualitative and Quantitative
Claxton et al. (2017)	2017	UK	Meta-Analysis	14 studies	Youth	Family interventions, psychosis	Clinical Psychology	Empirical researches	PRISMA	Up to 2016	Effective Public Health Practice Project Quality Assessment Tool	RevMan	Meta-analysis PRISMA	Qualitative and Quantitative
Clinton-Lisell & Litzinger (2024)	2024	USA	Meta-Analysis	21 studies	Mixed	Learning styles, educational outcomes	Educational Psychology	Empirical researches	PRISMA	Not specific	What Works Clearinghouse (2022)	Software R/Abstrackr	Meta-analysis PRISMA	Qualitative and Quantitative
Cochon Drouet et al. (2023)	2023	Switzerland	Meta-Analysis	43 studies	Youth	Achievement, motivation, social relations	Educational Psychology	Empirical researches	PRISMA	Up to 2023	PRISMA guidelines	MAJOR/Jamovi1.1.8.0	Meta-analysis PRISMA	Qualitative and Quantitative
Costa & Faria (2018)	2018	Portugal	Meta-Analysis	46 studies	Youth	Intelligence theories, academic achievement	Educational Psychology	Empirical researches	PRISMA	2002-2017	PRISMA guidelines	Comprehensive Meta-Analysis	Meta-analysis PRISMA	Qualitative and Quantitative
DeLaPeña & Luque-Rojas (2021)	2021	Spain	Meta-Analysis	7 studies	Adults	Reading comprehension	Educational Psychology	Empirical researches	PRISMA	2010-2021	PRISMA guidelines	Excel/Jamovi	Meta-analysis PRISMA	Qualitative and Quantitative
Deng et al. (2021)	2021	China	Meta-Analysis	35 studies	Youth	Empathy, bullying, prosocial behavior	Educational Psychology	Empirical researches	Not specific	1996-2020	Not specific	R	Meta-Analysis	Quantitative
Ding et al. (2022)	2022	China	Meta-Analysis	110 studies	Mixed	Smartphone addiction, well-being, attachment	Social Psychology	Empirical researches	PRISMA/PROSPERO	2013-2021	JBI Critical Appraisal Checklist	Stata	Meta-analysis PRISMA	Quantitative
Ding et al. (2022)	2022	China	Meta-Analysis	56 studies	Youth	Self-esteem, self-control, social support	Social Psychology	Empirical researches	PRISMA	2011-2022	JBI Critical Appraisal Checklist	Stata	Meta-analysis PRISMA	Quantitative
Dong et al. (2020)	2020	China	Meta-Analysis	46 studies	Youth	Reading comprehension, metalinguistic knowledge	Educational Psychology	Empirical researches	PRISMA	1998-2019	PRISMA guidelines	Comprehensive Meta-Analysis	Meta-analysis PRISMA	Qualitative and Quantitative
Dudley et al. (2022)	2022	Australia	Meta-Analysis	135 studies	Youth	Quality physical education, affective learning, social learning	Educational Psychology	Empirical researches	PRISMA/PICOS	1995-2021	PRISMA guidelines	Covidence/Comprehensive Meta-Analysis	Systematic Review and Meta-Analysis PRISMA	Qualitative and quantitative
Ebrahimi et al. (2019)	2019	Norway	Meta-Analysis	30 studies	Mixed	Anxiety and fear	Clinical Psychology	Empirical researches	PRISMA/MARS/PROSPERO	up to 2018	Cochrane	Comprehensive Meta-Analysis	Meta-analysis PRISMA	Qualitative and Quantitative
Fan et al. (2024)	2024	China	Meta-Analysis	30 studies	Youth	Parental involvement and creativity	Educational Psychology	Empirical researches	PRISMA	1991-2022	BQAPS	R	Meta-analysis PRISMA	Qualitative and Quantitative
Fang & Ding (2022)	2022	China	Meta-Analysis	36 studies	Adults	Flexibility, chronic pain, acceptance commitment therapy (ACT)	Clinical Psychology	Empirical researches	PRISMA/PROSPERO	2010-2022	PRISMA guidelines	Not specific	Meta-Analysis PRISMA	Quantitative
Fang et al. (2018)	2018	China	Meta-Analysis	33 studies	Youth	Academic self-concept	Educational Psychology	Empirical researches	PRISMA	1984-2018	PRISMA guidelines	Comprehensive Meta-Analysis	Meta-analysis PRISMA	Qualitative and Quantitative
Finell et al. (2022)	2022	Sweden	Meta-Analysis	57 studies	Mixed	Math anxiety and working memory	Clinical Psychology	Empirical researches	PRISMA	up to 2020	PRISMA guidelines	EndNote	Meta-analysis PRISMA	Qualitative and Quantitative
Fuller et al. (2022)	2022	Saudi Arabia, USA	Meta-Analysis	31 studies	Adults	Ethical leadership, authentic leadership	Social Psychology	Empirical researches	Schmidt and Hunter (2014)	up to 2018	Whitener (1990)	Not specific	Meta-analysis	Quantitative
Gegenfurtner (2022)	2022	Germany	Meta-Analysis	158 studies	Adults	Factor model fit	Quantitative Psychology	Empirical researches	PRISMA	up to 2022	PRISMA guidelines	Not specific	Meta-analysis	Quantitative
Gong et al. (2023)	2023	China, Taiwan	Meta-Analysis	9 studies	Mixed	Mindfulness, mental health	Clinical Psychology	Empirical researches	PRISMA/INPLASY	up to 2022	Cochrane	RevMan	Meta-analysis PRISMA	Qualitative and Quantitative
Haberstroh & Schulte-Körne (2022)	2022	Germany	Meta-Analysis	34 studies	Youth	Cognitive profile in math difficulties	Developmental Psychology	Empirical researches	PRISMA	1992-2021	Appraisal Tool For Cross-Sectional Studies (AXIS)	R	Meta-analysis PRISMA	Quantitative
Hancock et al. (2023)	2023	USA	Meta-Analysis	338 studies	Adults	Interpersonal trust	Social Psychology	Empirical researches	PRISMA/Schmidt and Hunter (2014)	1974-2018	PRISMA guidelines	Not specific	Meta-analysis PRISMA	Quantitative
He et al. (2023)	2023	China	Meta-Analysis	37 studies	Adults	Fear of disease progression	Health Psychology	Empirical researches	PRISMA/PROSPERO	2018-2022	Agency for Research and Healthcare Quality Scale (AHRQ)	Excel/Stata/EndNote	Meta-analysis PRISMA	Qualitative and Quantitative
Hu & Cheung (2024)	2024	China	Meta-Analysis	33 studies	Adults	Social identity, social integration	Social Psychology	Empirical researches	Mol and Bus (2011)	2005-2020	PRISMA guidelines	Comprehensive Meta-Analysis	Meta-analysis PRISMA	Qualitative and Quantitative
Hua et al. (2022)	2022	China	Meta-Analysis	32 studies	Youth	Entrepreneurial activities, abilities	Educational Psychology	Empirical researches	Not specific	2008-2021	Not specific	Comprehensive Meta-Analysis	Meta-analysis	Qualitative and Quantitative
Jiang et al. (2023)	2023	China	Meta-Analysis	20 studies	Youth	Parental involvement, academic achievement	Educational Psychology	Empirical researches	PRISMA	2005-2022	JBI Critical Appraisal Checklist	Comprehensive Meta-Analysis	Meta-analysis PRISMA	Quantitative
Jianping et al. (2023)	2023	Malaysia	Meta-Analysis	12 studies	Adults	Mental toughness, resilience	Educational Psychology	Empirical researches	PRISMA	2010-2021	Kmet et al. (2004)	Comprehensive Meta-Analysis	Meta-analysis PRISMA	Qualitative and Quantitative
Jinmin & Qi (2023)	2023	China	Meta-Analysis	13 studies	Youth	Learning flow, academic performance	Educational Psychology	Empirical researches	PRISMA	2000-2023	PRISMA guidelines	StataSE/EndNote/R	Meta-analysis PRISMA	Quantitative
Kenny et al. (2023)	2023	USA	Meta-Analysis	69 studies	Children	Self-regulation, executive function	Educational Psychology	Empirical researches	PRISMA	2007-2022	Zangaro and Soeken (2005)	Stata	Meta-analysis PRISMA	Qualitative and Quantitative
Kim & Cruz (2021)	2021	South Korea	Meta-Analysis	22 studies	Adults	Martial arts, self-regulation	Social Psychology	Empirical researches	Hunter and Schmidt, 2004	2008-2019	Not specific	Comprehensive Meta-Analysis	Meta-Analysis	Quantitative
Knitter et al. (2025)	2025	Germany	Meta-Analysis	51 studies	Mixed	Dark Triad, bifactor model, TSSEM	Educational Psychology	Empirical researches	PRISMA	2019-2021	PRISMA guidelines	R	Meta-Analysis PRISMA	Quantitative
Knogler et al. (2022)	2022	Germany	Meta-Analysis	41 studies	Youth	Teaching strategies	Educational Psychology	Meta-analysis	PRISMA	2004-2019	AMSTAR/MARS	Not specific	Meta-analysis PRISMA	Quantitative
Koutsimani et al. (2019)	2019	Greece	Meta-Analysis	67 studies (depression), 34 studies (anxiety)	Adults	Burnout, depression, anxiety	Clinical Psychology	Empirical researches	PRISMA/PROSPERO	2007-2018	Quality Assessment Tool for Observational Cohort and Cross Sectional Studies	Comprehensive Meta-Analysis	Meta-analysis PRISMA	Qualitative and Quantitative
Li et al. (2018)	2018	China, USA	Meta-Analysis	59 studies	Youth	Self-regulation, academic performance	Educational Psychology	Empirical researches	Not specific	up to 2018	Not specific	Comprehensive Meta-Analysis	Meta-analysis	Quantitative
Li et al. (2022)	2022	China	Meta-Analysis	43 studies	Youth	Mental health, socioeconomic factors	Educational Psychology	Empirical researches	PRISMA	1995-2019	PRISMA guidelines	Not specific	Meta-analysis PRISMA	Quantitative
Li et al. (2023)	2023	China	Meta-Analysis	41 studies	Mixed	Gamification, motivation	Educational Psychology	Empirical researches	PRISMA	2010-2022	PRISMA guidelines	Comprehensive Meta-Analysis	Meta-analysis PRISMA	Qualitative and quantitative
Lin et al. (2023)	2023	China	Meta-Analysis	40 studies	Youth	Body cognition, virtual reality	Educational Psychology	Empirical researches	PRISMA	2010-2023	PRISMA guidelines	Comprehensive Meta-Analysis	Meta-analysis PRISMA	Quantitative
Liu & Abdul Rahman (2022)	2022	Malaysia	Meta-Analysis	16 studies	Youth	Parenting style, sibling conflicts	Educational Psychology	Empirical researches	PRISMA	up to 2022	PRISMA guidelines	Comprehensive Meta-Analysis	Meta-analysis PRISMA	Quantitative
Llistosella et al. (2023)	2023	Spain	Meta-Analysis	27 studies	Youth	Resilience, school interventions	Educational Psychology	Empirical researches	PRISMA/PROSPERO	up to 2023	Cochrane	Rayyan/Stata/R	Meta-analysis PRISMA	Qualitative and quantitative
López-Escribano et al. (2022)	2022	Spain	Meta-Analysis	31 studies	Children	Writing Fluency	Educational Psychology	Different researches	PRISMA	2000-2020	Gersten et al. (2005)	Meta-Essential	Meta-analysis PRISMA	Qualitative and quantitative
Mao et al. (2021)	2021	China	Meta-Analysis	37 studies	Youth	Science attitude	Educational Psychology	Empirical researches	PRISMA	1982-2020	PRISMA guidelines	Not specific	Meta-analysis PRISMA	Quantitative
Mao et al. (2024)	2024	China, USA	Meta-Analysis	23 studies	Youth	Cognitive engagement, executive function, physical activity	Educational Psychology	Empirical researches	PRISMA/PICOS	Up to 2024	PEDro scale	Comprehensive Meta-Analysis	Meta-analysis PRISMA	Qualitative and Quantitative
Mao et al. (2024)	2024	China	Meta-Analysis	12 studies	Youth	Football training, cognition, inhibitory control	Developmental Psychology	Empirical researches	PRISMA/PROSPERO/PICOS	Up to 2024	ROBINS-I	Comprehensive Meta-Analysis	Meta-analysis PRISMA	Qualitative and Quantitative
Mitic et al. (2021)	2021	Austria, UK	Meta-Analysis	303 studies	Youth	Peer relationships	Social Psychology	Empirical researches	PRISMA/PROSPERO	1999-2021	Newcastle Ottawa Scale/Agency for Healthcare Research and Quality	QSR/NVivo	Meta-analysis PRISMA	Qualitative and Quantitative
Moreno-Alcázar et al. (2017)	2017	Spain, Sweden, UK	Meta-Analysis	8 studies	Youth	PTSD, EMDR	Clinical Psychology	Empirical researches	PRISMA/PROSPERO	1998-2015	Cochrane	MetaNSUE	Meta-analysis PRISMA	Quantitative
Ni et al. (2022)	2022	China	Meta-Analysis	35 studies	Youth	Educational technology	Educational Psychology	Empirical researches	PRISMA	2000-2020	PRISMA guidelines	Comprehensive Meta-Analysis	Meta-analysis PRISMA	Quantitative
Oliveira et al. (2021)	2021	Portugal	Meta-Analysis	43 studies	Adults	Socio-emotional learning	Educational Psychology	Empirical researches	PRISMA	1995-2021	PRISMA guidelines	Not specific	Meta-analysis PRISMA	Quantitative
Özdemir & Seçkin (2024)	2024	Turkey	Meta-Analysis	23 studies	Mixed	Educational technology	Educational Psychology	Empirical researches	PRISMA	2016-2023	PRISMA guidelines	Not specific	Meta-analysis PRISMA	Quantitative
Paruzel et al. (2021)	2021	Germany	Meta-Analysis	143 studies	Adults	CSR and employee outcomes	Social Psychology	Empirical researches	Schmidt and Hunter (2014)	up to 2021	Not specific	Not specific	Meta-analysis	Quantitative
Pascual et al. (2019)	2019	Spain	Meta-Analysis	19 studies	Children	Executive functions	Educational Psychology	Empirical researches	Cochrane	2009-2018	Not specific	Comprehensive Meta-Analysis/ Excel	Meta-analysis	Qualitative and quantitative
Pasion et al. (2017)	2017	Portugal	Meta-Analysis	53 studies	Adults	Reversal learning, Iowa Gambling Task, decision-making	Cognitive Psychology	Empirical researches	PRISMA	1994-2016	PRISMA guidelines	Comprehensive Meta-Analysis	Meta-analysis PRISMA	Qualitative and Quantitative
Pedersen et al. (2017)	2017	Norway	Meta-Analysis	12 studies	Adults	Agitation reduction	Health Psychology	Empirical researches	Not specific	1998-2015	Not specific	Comprehensive Meta-Analysis/ Excel	Meta-analysis	Qualitative and quantitative
Peng (2023)	2023	China	Meta-Analysis	24 studies	Adults	Workplace civility	Social Psychology	Different researches	PRISMA/JBI	up to 2023	Sirriyeh et al. (2012)	EndNote/ Comprehensive Meta-Analysis	Meta-analysis PRISMA	Qualitative and quantitative
Peng et al. (2022)	2022	China, Malaysia	Meta-Analysis	31 studies	Youth	Physical activity	Health Psychology	Empirical researches	PRISMA	up to 2020	Cochrane	EndNote/Stata/Revman	Meta-analysis PRISMA	Quantitative
Peng et al. (2023)	2023	USA	Meta-Analysis	26 studies	Mixed	Guilt appeals	Health Psychology	Empirical researches	PRISMA/PICOS	1929-2020	PRISMA guidelines	R	Meta-analysis PRISMA	Quantitative
Peña-Sarrionandia et al. (2015)	2015	Belgium, Spain, USA	Meta-Analysis	135 studies	Mixed	Emotion regulation	Health Psychology	Empirical researches	Not specific	up to 2014	Not specific	Not specific	Meta-analysis	Quantitative
Pietschnig et al. (2024)	2024	Austria	Meta-Analysis	22 studies	Adults	Smoking behavior, suicidality, mental health risks	Clinical Psychology	Empirical researches	PRISMA	2003-2015	Newcastle-Ottawa Quality Assessment Scale	R	Meta-analysis PRISMA	Quantitative
Pinto et al. (2021)	2021	Brazil	Meta-Analysis	17 studies	Youth	Resilience, cognitive development, mental health	Clinical Psychology	Empirical researches	PRISMA/PROSPERO	2013-2020	Cochrane	R	Meta-analysis PRISMA	Qualitative and Quantitative
Pit-ten Cate & Glock (2019)	2019	Germany, Luxembourg	Meta-Analysis	22 studies	Adults	Implicit bias	Educational Psychology	Empirical researches	PRISMA	1998-2019	PRISMA guidelines	Excel	Meta-analysis PRISMA	Qualitative and quantitative
Rozental et al. (2018)	2018	Denmark, Germany, Sweden, UK	Meta-Analysis	12 Studies	Adults	Procrastination	Clinical Psychology	Empirical researches	PROSPERO		Cochrane	R	Meta-analysis PRISMA	Qualitative and quantitative
Salgado & Moscoso (2019)	2019	Spain	Meta-Analysis	224 studies	Mixed	Interrater reliability	Social Psychology	Empirical researches	PRISMA/MARS/Aytug et al. (2012)	1994-2017	PRISMA guidelines	Schmidt and Le’s software/Excel	Meta-analysis PRISMA	Quantitative
Salgado & Moscoso (2019)	2019	Spain	Meta-Analysis	467 studies	Adults	General mental ability	Social Psychology	Empirical researches	PRISMA/MARS	1950–1985	PRISMA guidelines	Not specific	Meta-analysis PRISMA	Quantitative
Salgado et al. (2022)	2022	Spain	Meta-Analysis	206 studies	Youth	Counterproductive behavior	Educational Psychology	Empirical researches	PRISMA	1975-2022	PRISMA guidelines	Schmidt and Le’s software	Meta-analysis PRISMA	Quantitative
Sanchez-Alvarez et al. (2020)	2020	Spain	Meta-Analysis	44 articles	Youth	Emotional intelligence	Educational Psychology	Empirical researches	PRISMA	1999-2020	PRISMA guidelines	R	Meta-analysis PRISMA	Quantitative
Sánchez-López et al. (2022)	2022	Spain	Meta-Analysis	12 studies	Mixed	Emotional intelligence, risk behavior	Health Psychology	Empirical researches	PRISMA	1990-2020	Cochrane	R	Meta-analysis PRISMA	Qualitative and quantitative
Shao et al. (2023)	2023	China	Meta-Analysis	46 studies	Mixed	Regulation strategies	Educational Psychology	Empirical researches	PRISMA	2000-2021	PRISMA guidelines	Comprehensive Meta-Analysis	Meta-analysis PRISMA	Quantitative
Shen et al. (2021)	2021	China, USA	Meta-Analysis	6 studies	Adults	Elder abuse	Clinical Psychology	Empirical researches	Cochrane	1990-2020	Cochrane/ Jadad scale	R	Meta-analysis	Qualitative and quantitative
Shi et al. (2022)	2022	China	Meta-Analysis	20 studies	Children	Social skills	Educational Psychology	Empirical researches	Not specific	up to 2020	Not specific	Not specific	Meta-analysis	Quantitative
Sierra-Díaz et al. (2019)	2019	Spain	Meta-Analysis	33 studies	Youth	Physical education, self-determination theory, motivation	Educational Psychology	Empirical researches	PRISMA/PROSPERO	2003-2019	Checklist for Measuring Study Quality/AXIS/Cochrane	Mendeley/Comprehensive Meta-Analysis	Meta-Analysis PRISMA	Qualitative and Quantitative
Smale-Jacobse et al. (2019)	2019	Netherlands	Meta-Analysis	12 studies	Youth	Differentiated instruction	Educational Psychology	Empirical researches	Not specific	2006-2016	Not specific	Comprehensive Meta-Analysis/ Excel	Meta-analysis	Qualitative and quantitative
Su & Chan (2023)	2023	China	Meta-Analysis	46 studies	Adults	Wellbeing, capabilities	Social Psychology	Empirical researches	Not specific	up to 2022	Not specific	Comprehensive Meta-Analysis/EndNote	Meta-analysis	Quantitative
Subara-Zukic et al. (2022)	2022	Czechia, Australia, Belgium, Germany, Netherlands, South Africa, Sweden, UK	Meta-Analysis	100 studies	Youth	Motor integration	Developmental Psychology	Empirical researches	PRISMA/PROSPERO/PICOS	2016-2021	Critical Appraisal Skills Programme for case-control studies	Excel/R	Meta-analysis PRISMA	Quantitative
Tang & He (2023)	2023	China	Meta-Analysis	5 studies	Youth	Anxiety, performance	Educational Psychology	Empirical researches	PRISMA	2019-2022	MQQ	Not specific	Meta-analysis PRISMA	Quantitative
Wang & Wang (2022)	2022	China	Meta-Analysis	42 studies	Adults	Emotional intelligence	Social Psychology	Empirical researches	Hunter and Schmidt (2004)	up to 2022	Not specific	SPSS/Comprehensive Meta analysis	Meta-analysis	Quantitative
Wang et al. (2021)	2021	China	Meta-Analysis	21 studies	Mixed	Mental contrast, self-implementation	Social Psychology	Empirical researches	Not specific	up to 2021	Rosenthal’s fail-safe N	Comprehensive Meta-Analysis	Meta-analysis	Quantitative
Wang et al. (2023)	2023	China	Meta-Analysis	31 studies	Youth	Childhood trauma, problematic internet use	Clinical Psychology	Empirical researches	PRISMA	2009-2022	PRISMA guidelines	Comprehensive Meta-Analysis	Meta-analysis PRISMA	Qualitative and quantitative
Ware et al. (2020)	2020	Australia	Meta-Analysis	170 studies	Mixed	Bilingualism, executive function	Clinical Psychology	Empirical researches	PRISMA	up to 2020	Classic Fail-Safe N/PET-PEESE	Not specific	Meta-analysis PRISMA	Quantitative
Wisniewski et al. (2020)	2020	Germany	Meta-Analysis	435 studies	Mixed	Feedback, learning	Educational Psychology	Empirical researches	PRISMA	up to 2020	PRISMA guidelines	R	Meta-analysis PRISMA	Quantitative
Xie et al. (2018)	2018	China	Meta-Analysis	114 studies	Children	Mathematics achievement	Educational Psychology	Empirical researches	Glass et al. (1984)/Lipsey and Wilson (2001)/Borenstein et al. (2009)	1986-2015	Not specific	Comprehensive Meta-Analysis	Meta-analysis	Quantitative
Xie et al. (2018)	2018	China	Meta-Analysis	36 studies	Children	Touchscreen learning, early childhood education	Educational Psychology	Empirical researches	PRISMA	2012-2018	PRISMA guidelines	Comprehensive Meta-Analysis	Meta-Analysis PRISMA	Qualitative and Quantitative
Xu & Wang (2023)	2023	China	Meta-Analysis	36 studies	Adults	Anxiety, depression, stress	Educational Psychology	Empirical researches	Not specific	2019-2022	Rosenthal’s fail-safe N	Comprehensive Meta-Analysis	Meta-analysis	Qualitative and quantitative
Xu & Xue (2023)	2023	China, UK	Meta-Analysis	52 studies	Mixed	Educational satisfaction	Educational Psychology	Empirical researches	Not specific	up to 2022	Not specific	Comprehensive Meta-Analysis	Meta-analysis	Qualitative and quantitative
Xuan et al. (2022)	2022	China	Meta-Analysis	48 studies	Youth	Formative assessment, reading	Educational Psychology	Empirical researches	PRISMA/Glass et al. (1981)/Lipsey and Wilson (2001)	up tp 2021	PRISMA guidelines	Comprehensive Meta-Analysis	Meta-analysis PRISMA	Quantitative
Yang et al. (2020)	2020	China, New Zealand, Singapore, USA	Meta-Analysis	20 studies	Children	Spatial skills, development	Developmental Psychology	Empirical researches	PRISMA	2009-2020	PRISMA guidelines	Comprehensive Meta-Analysis	Meta-analysis PRISMA	Qualitative and quantitative
Yang et al. (2022b)	2022	China	Meta-Analysis	19 studies	Adults	Recreational activities, cognitive aging	Developmental Psychology	Empirical researches	PRISMA/PROSPERO	2012-2022	Scottish Intercollegiate Guidelines Network	Not specific	Meta-analysis PRISMA	Qualitative and quantitative
Yildiz et al. (2022)	2022	Turkey, UK	Meta-Analysis	36 studies	Adults	Work commitment, satisfaction	Social Psychology	Empirical researches	PRISMA/PICOS	up to 2022	Quality Assessmentand Validity Tool for Correlational Studies	R/EndNote	Meta-analysis PRISMA	Quantitative
Yilmazer et al. (2024)	2024	Turkey	Meta-Analysis	22 studies	Mixed	Test anxiety, mindfulness	Clinical Psychology	Empirical researches	Not specific	2007-2022	Not specific	R/Excel/Comprehensive Meta-Analysis	Meta-analysis	Qualitative and quantitative
Yoon et al. (2021)	2021	South Korea	Meta-Analysis	184 studies	Mixed	Gaming disorder, validity	Quantitative Psychology	Empirical researches	PRISMA/PROSPERO	up to 2020	PRISMA guidelines	R	Meta-analysis PRISMA	Quantitative
Yu et al. (2022)	2022	China, Macau, Thailand	Meta-Analysis	30 studies	Mixed	Attitudes, blended learning	Educational Psychology	Empirical researches	STARLITE	2000-2020	University of West England Framework for Critically Appraising Research Articles	Stata/MP 14.0	Meta-analysis	Qualitative and quantitative
Yu et al. (2024)	2024	China	Meta-Analysis	17 studies	Mixed	Cognitive load, ERP	Educational Psychology	Empirical researches	PRISMA	2003-2022	PRISMA guidelines	Comprehensive Meta-Analysis/ Excel	Meta-analysis PRISMA	Quantitative
Zeng et al. (2022)	2022	China	Meta-Analysis	28 studies	Mixed	Self-efficacy, TPACK	Educational Psychology	Empirical researches	PRISMA	2007-2022	PRISMA guidelines	Comprehensive Meta-Analysis	Meta-analysis PRISMA	Quantitative
Zhan et al. (2024)	2024	China	Meta-Analysis	19 studies	Mixed	Creativity, problem-solving	Educational Psychology	Empirical researches	PRISMA	up to 2023	PRISMA guidelines	R	Meta-analysis PRISMA	Qualitative and quantitative
Zhang & Ma (2023)	2023	China	Meta-Analysis	66 studies	Mixed	PBL, effective learning	Educational Psychology	Empirical researches	PRISMA/Glass (1976)	2003-2023	PRISMA guidelines	Comprehensive Meta-Analysis	Meta-analysis PRISMA	Qualitative and quantitative
Zhang et al. (2022)	2022	China	Meta-Analysis	16 studies	Mixed	Neural synchronization, teaching-learning interaction	Educational Psychology	Empirical researches	Lipsey and Wilson (2001) and Higgins and Green (2011)	2013-2021	Not specific	Comprehensive Meta-Analysis	Meta-Analysis	Quantitative
Zhang et al. (2023)	2023	China	Meta-Analysis	39 studies	Youth	Internet addiction, mental health, behavioral therapy	Educational Psychology	Empirical researches	PRISMA/PROSPERO	Up to 2022	Cochrane	NoteExpress/Stata	Meta-Analysis PRISMA	Qualitative and Quantitative
Zhao & Yu (2021)	2021	China	Meta-Analysis	38 studies	Youth	Moral disengagement, cyberbullying	Social Psychology	Empirical researches	PRISMA	2005-2021	PRISMA guidelines	Comprehensive Meta-Analysis	Meta-analysis PRISMA	Quantitative
Zheng et al. (2023)	2023	Canada, USA	Meta-Analysis	23 studies	Mixed	Emotions in learning	Educational Psychology	Empirical researches	Not specific	2009-2020	Not specific	Not specific	Meta-analysis	Qualitative and quantitative
Zheng et al. (2023)	2023	China	Meta-Analysis	88 studies	Mixed	Grammatical knowledge, reading	Educational Psychology	Empirical researches	PRISMA	1998-2021	PRISMA guidelines	Comprehensive Meta-Analysis	Meta-analysis PRISMA	Quantitative
Zhong et al. (2024)	2024	China	Meta-Analysis	49 studies	Youth	Academic performance, emotions	Educational Psychology	Empirical researches	Glass (1976)	1986-2023	Not specific	Comprehensive Meta-Analysis/EndNote	Meta-analysis	Quantitative
Zhou et al. (2022)	2022	China	Meta-Analysis	56 studies	Mixed	Materialism, wellbeing	Social Psychology	Empirical researches	MARS	up to 2022	Not specific	Comprehensive Meta-Analysis	Meta-analysis	Quantitative
Zhu et al. (2022)	2022	China	Meta-Analysis	75 studies	Mixed	Parent-child relationship, internet use	Health Psychology	Empirical researches	PRISMA	1990-2021	JBI Critical Appraisal Checklist	Comprehensive Meta-Analysis	Meta-analysis PRISMA	Quantitative

## Sheet: Systematic Review
Study	Year	Country	Study Type	N	Age	Constructs	Topic	Fidelity (Study type)	Validation	Period	Quality	Software	Methodology	Data Analysis
Aithal et al. (2021)	2021	UK	Systematic Review	9 studies	Children	Dance, movement, well-being	Clinical Psychology	Empirical researches	PRISMA/PROSPERO	2001-2020	Mixed Methods Appraisal Tool (MMAT)	Not specific	Meta-analysis PRISMA	Qualitative
Akram et al. (2022)	2022	China, Jordan, Pakistan, Saudi Arabia	Systematic Review	25 studies	Mixed	Technology, teaching	Educational Psychology	Different researches	Denyer and Tranfield (2009)	2017-2021	Not specific	Not specific	Systematic review	Qualitative
Alonzo et al. (2023)	2023	Australia, Myanmar, Indonesia	Systematic Review	17 studies	Youth	Social Media, Assessment	Educational Psychology	Different researches	PRISMA	Up to 2022	PRISMA guidelines	Not specific	Systematic Review PRISMA	Qualitative
Álvarez-Godos et al. (2023)	2023	Spain	Systematic Review	24 studies	Youth	ADHD, Academic Support	Educational Psychology	Empirical researches	PRISMA/PICOC	2017-2022	PRISMA guidelines	MAXQDA 2022	Systematic Review PRISMA	Qualitative
Amores-Valencia et al. (2022)	2022	Colombia, Spain	Systematic Review	13 studies	Youth	Motivation, academic performance	Educational Psychology	Empirical researches	PRISMA	2012-2022	RSL	Not specific	Systematic review PRISMA	Qualitative
Annous et al. (2022)	2022	Lebanon, UAE	Systematic Review	8 studies	Mixed	PTSD, trauma	Developmental Psychology	Empirical researches	PRISMA	2010-2020	CEC	Not specific	Systematic review PRISMA	Qualitative
Ashraf et al. (2022)	2022	China, Pakistan, USA	Systematic Review	34 studies	Youth	Blended Learning, Online Education	Educational Psychology	Different researches	PRISMA	2016-2021	Rowe et al. (2012)	Mendeley	Systematic Review PRISMA	Qualitative
Aziku & Zhang (2024)	2024	China	Systematic Review	103 studies	Adults	Teacher well-being	Educational Psychology	Empirical researches	PRISMA	2020-2024	PRISMA guidelines	Not specific	Systematic review PRISMA	Quantitative
Ballesteros-Quilez et al. (2022)	2022	Spain, Chile	Systematic Review	32 studies	Mixed	Squatting movement, Counter-hegemony	Social Psychology	Different researches	PRISMA	2019-2021	PRISMA guidelines	Not specific	Systematic Review PRISMA	Qualitative
Beaudoin et al. (2020)	2020	Canada	Systematic Review	830 studies	Children	Theory of mind	Developmental Psychology	Empirical researches	PRISMA	1983-2019	PRISMA guidelines	Endnote	Systematic review PRISMA	Qualitative and Quantitative
Beckmann & Minnaert (2018)	2018	Netherlands	Systematic Review	23 studies	Youth	Giftedness, Learning Disabilities	Educational Psychology	Empirical researches	Not specific	1982-2015	Not specific	Not specific	Systematic Review	Qualitative
Beer & Mulder (2020)	2020	Germany	Systematic Review	21 studies	Adults	Jwork technological changes	Social Psychology	Empirical researches	Not specific	up to 2020	Not specific	Not specific	Systematic review	Qualitative and Quantitative
Bi et al. (2022)	2022	China, UK	Systematic Review	128 studies	Mixed	Speech processing	Clinical Psychology	Different researches	PRISMA	1974-2022	PRISMA guidelines	Excel	Systematic review PRISMA	Qualitative and Quantitative
Bodart et al. (2023)	2023	Belgium	Systematic Review	18 studies	Adults	Traumatic Brain Injury, Physiological Reactivity	Clinical Psychology	Empirical researches	PRISMA/PROSPERO	2000-2021	Farrington’s suggestions	Not specific	Systematic Review PRISMA	Qualitative
Bono et al. (2021)	2021	Spain	Systematic Review	80 articles	Mixed	General linear models	Quantitative Psychology	Empirical researches	PRISMA	2014-2018	PRISMA guidelines	Not specific	Systematic review PRISMA	Quantitative
Bravo-Sanzana et al. (2023)	2023	Chile	Systematic Review	27 studies	Children	School social climate	Educational Psychology	Empirical researches	PRISMA/PROSPERO	2010-2022	COSMIN	Rayyan	Systematic review PRISMA	Qualitative
Caetano et al. (2021)	2021	Portugal	Systematic Review	26 studies	Adults	Substance Use Disorders, Cognitive Training	Cognitive Psychology	Empirical researches	PRISMA/PICO/PROSPERO	1985-2019	Cochrane/ROBINS-I	Not specific	Systematic Review PRISMA	Qualitative
Canedo-García et al. (2017)	2017	Spain	Systematic Review	50 studies	Mixed	Intergenerational Programs, Lifelong Learning	Educational Psychology	Empirical researches	PRISMA	2004-2015	PRISMA guidelines	Not specific	Systematic Review PRISMA	Qualitative and Quantitative
Cao et al. (2022)	2022	China	Systematic Review	37 studies	Mixed	Feedback, motivation	Educational Psychology	Empirical researches		2012 - 2022	PRISMA guidelines	Excel	Systematic review PRISMA	Qualitative
Cawley et al. (2022)	2022	UK	Systematic Review	17 studies	Mixed	Memory, Pharmacological Modulation, Depression	Cognitive Psychology	Empirical researches	PRISMA/PROSPERO	1994-2021	PRISMA guidelines	SPSS	Systematic Review PRISMA	Qualitative and Quantitative
Chaguendo-Quintero et al. (2023)	2023	Colombia, Spain	Systematic Review	8 studies	Adults	Executive Functions, Cognitive Flexibility, Memory	Social Psychology	Empirical researches	PRISMA/PROSPERO/PICOS	2007-2023	Quality Assessment Tool for observational studies from the National Heart	Rayyan/Mendeley	Systematic Review PRISMA	Qualitative and Quantitative
Challet-Bouju et al. (2017)	2017	France	Systematic Review	51 studies	Adults	Gambling Disorder, Cognitive Remediation	Social Psychology	Empirical researches	PRISMA	Up to 2017	PRISMA guidelines	Not specific	Systematic Review PRISMA	Qualitative
Chaxiong et al. (2022)	2022	USA	Systematic Review	41 studies	Children	Autism Spectrum Disorder, Behavior	Developmental Psychology	Empirical researches	PRISMA	1999-2020	PRISMA guidelines	Not specific	Systematic Review PRISMA	Qualitative and quantitative
Costa & Kuss (2019)	2019	Italy, UK	Systematic Review	28 studies	Youth	Gaming disorder, diagnosis	Clinical Psychology	Empirical researches	PRISMA	2010-2018	Cochrane	Not specific	Systematic review PRISMA	Qualitative
Cunha et al. (2022)	2022	Portugal	Systematic Review	77 studies	Adults	Industry 4.0, Work Sustainability	Social Psychology	Different researches	PRISMA	2015-2021	PRISMA guidelines	Not specific	Systematic Review PRISMA	Qualitative
De Lange et al. (2021)	2021	Belgium, China, Netherlands, Norway, Spain, UK	Systematic Review	41 studies	Adults	Employability, age perception	Social Psychology	Empirical researches	Petticrew and Roberts (2006)	1980-2019	Standardized Index of Convergence (SIC)	Not specific	Systematic review PRISMA	Qualitative and Quantitative
De Oliveira et al. (2023)	2023	Spain	Systematic Review	66 studies	MIxed	Suicide prevention, educational policies	Educational Psychology	Different researches	PRISMA	1990-2023	Critical Appraisal Skills Programme	Excel/Atlas.ti/EndNote	Systematic Review PRISMA	Qualitative
Delfa-Lobato et al. (2021)	2021	Spain	Systematic Review	145 studies	Adults	Well-being, quality of life	Health Psychology	Empirical researches	PRISMA/PICOS	2010-2020	PRISMA guidelines	Not specific	Systematic review PRISMA	Qualitative
Deng et al. (2024)	2024	China, Japan	Systematic Review	22 studies	Adults	Robot-Assisted Language Learning (RALL), second language acquisition	Educational Psychology	Empirical researches	Not specific	2016-2024	Not specific	Not specific	Systematic Review	Qualitative
Dias Rodrigues et al. (2022)	2022	Portugal	Systematic Review	19 studies	Children	Social-emotional competence, physical activity	Educational Psychology	Empirical researches	PRISMA/PROSPERO	2000-2020	PEDro scale	Not specific	Systematic Review PRISMA	Qualitative
Domínguez-García & Fernández-Berrocal (2018)	2018	Spain	Systematic Review	25 studies	Mixed	Emotional intelligence, suicidal behavior	Clinical Psychology	Empirical researches	Not specific	up to 2018	Not specific	Not specific	Systematic review	Qualitative
Don & Zeb (2022)	2022	China, Pakistan	Systematic Review	2500 studies	Youth	Legal socialization, moral education	Educational Psychology	Different researches	Not specific	2000-2022	Not specific	VOSviewer	Bibliometric Analysis	Qualitative
Dreer (2023)	2023	Germany	Systematic Review	44 studies	Adults	Teacher well-being, educational outcomes	Social Psychology	Empirical researches	PRISMA	up to 2023	PRISMA guidelines	Not specific	Systematic review PRISMA	Qualitative
Dumont et al. (2017)	2017	Netherlands	Systematic Review	46 studies	Children	Musical interventions and development	Educational Psychology	Empirical researches	Melnyk and Fineout-Overholt (2005)	2010-2016	Dutch Institute for Health Care Improvement (CBO)	Not specific	Systematic review PRISMA	Qualitative
Edisherashvili et al. (2022)	2022	Estonia	Systematic Review	38 studies	Adults	Self-regulated learning	Educational Psychology	Empirical researches	PRISMA	2010-2020	PRISMA guidelines	Not specific	Systematic review PRISMA	Qualitative and Quantitative
Fabregues et al. (2023)	2023	Spain, Colombia, Canada	Systematic Review	34 studies	Youth	Mixed methods, STEM education	Educational Psychology	Empirical researches	PRISMA	1998-2019	GRAMMS	Excel/MAXQDA	Systematic Review PRISMA	Qualitative
Fernández-Martín et al. (2021)	2021	Spain	Systematic Review	22 studies	Children	Social-emotional learning (SEL), well-being	Educational Psychology	Empirical researches	PRISMA	2010-2020	PRISMA guidelines	Not specific	Systematic Review PRISMA	Qualitative
Filipe et al. (2021)	2021	Portugal	Systematic Review	29 studies	Children	Cognitive and socio-emotional skills	Educational Psychology	Empirical researches	PRISMA/PROSPERO/PICOS	2009-2021	Cochrane	Rayyan	Systematic review PRISMA	Qualitative and Quantitative
Filipe et al. (2022)	2022	Portugal	Systematic Review	9 studies	Children	Language development	Developmental Psychology	Empirical researches	PRISMA	2012-2022	PRISMA guidelines	Not specific	Systematic review PRISMA	Qualitative
Frantz et al. (2022)	2022	South Africa	Systematic Review	11 studies	Adults	Retention of postgraduate students	Educational Psychology	Empirical researches	PRISMA	2010-2021	Form D of the SFS scoring system	Not specific	Systematic review PRISMA	Qualitative
Fu et al. (2017)	2017	China, USA	Systematic Review	21 studies	Adults	Cancer, depression, anxiety	Clinical Psychology	Empirical researches	PRISMA	2011-2016	Cochrane	Not specific	Systematic review PRISMA	Qualitative
Fulantelli et al. (2022)	2022	Italy, Germany	Systematic Review	24 studies	Youth	Cyberbullying, social media, well-being	Educational Psychology	Empirical researches	PRISMA/PROSPERO	2000-2021	PRISMA guidelines	Not specific	Systematic Review PRISMA	Qualitative
Gao et al. (2023)	2023	Malaysia	Systematic Review	17 studies	Adults	Knowledge transfer, talent identification	Developmental Psychology	Empirical researches	PRISMA/INPLASY/PICOS	2003-2021	PRISMA guidelines	Not specific	Systematic Review PRISMA	Qualitative
Gao et al. (2024)	2024	Malaysia	Systematic Review	29 studies	Mixed	Parental support, self-determination	Developmental Psychology	Empirical researches	PRISMA	1999-2023	PRISMA guidelines	Zotero/Excel	Systematic Review PRISMA	Qualitative
Gómez-Zúñiga et al. (2023)	2023	Spain	Systematic Review	75 studies	Adults	Loneliness, disability	Health Psychology	Empirical researches	PRISMA/PROSPERO	2000-2021	PRISMA guidelines	Not specific	Systematic review PRISMA	Qualitative
Gumz et al. (2015)	2015	Germany	Systematic Review	179 studies	Adults	Verbal techniques in psychotherapy	Clinical Psychology	Empirical researches	Not specific	1940-2013	Not specific	Not specific	Systematic Review	Qualitative
Gutiérrez-Ángel et al. (2022)	2022	Spain, Portugal	Systematic Review	22 studies	Youth	Digital competencies, online learning, digital skills	Educational Psychology	Empirical researches	PRISMA	2010-2021	MQQ	Not specific	Systematic Review PRISMA	Qualitative
Guzzardi et al. (2024)	2024	Italy	Systematic Review	49 studies	Youth	Prospective memory, executive functions	Educational Psychology	Empirical researches	PRISMA	1983-2024	Standard Quality Assessment Criteria for Evaluating Primary Research Papers from a Variety of Fields	Rayyan	Systematic Review PRISMA	Qualitative
Hammerstein et al. (2021)	2021	Germany, Norway	Systematic Review	11 studies	Youth	Academic achievement	Educational Psychology	Empirical researches	PRISMA	2020-2021	Cochrane	Not specific	Systematic review PRISMA	Qualitative
Hantman et al. (2023)	2023	Canada, Korea, USA	Systematic Review	103 studies	Youth	Bilingual experiences in ASD	Developmental Psychology	Empirical researches	PRISMA	1984-2021	PRISMA guidelines	Not specific	Systematic review PRISMA	Qualitative
He et al. (2023)	2023	Poland	Systematic Review	45 studies	Youth	Physical education, student performance	Educational Psychology	Systematic review	PRISMA	2000-2023	PRISMA guidelines	Not specific	Systematic Review PRISMA	Qualitative
Hobbs et al. (2022)	2022	UK	Systematic Review	27 studies	Youth	Psychological well-being, life satisfaction	Educational Psychology	Empirical researches	PRISMA/PICOS	1998-2021	ROBINS-I	Not specific	Systematic review PRISMA	Qualitative
Hoedemakers et al. (2023)	2023	Netherlands	Systematic Review	17 studies	Adults	Leadership, employability	Social Psychology	Empirical researches	PRISMA/SALSA	Up to 2022	PRISMA guidelines	VOSviewer	Systematic Review PRISMA	Qualitative And Quantitative
Hokstad & Næss (2023)	2023	Norway	Systematic Review	14 studies	Youth	Stuttering, communication	Developmental Psychology	Empirical researches	PRISMA/PROSPERO	1955-2022	Appraisal Tool For Cross-Sectional Studies (AXIS)	SPSS	Systematic review PRISMA	Qualitative and Quantitative
Horner and Shaffer (2021)	2021	USA	Systematic Review	57 studies	Children	Alphabet knowledge, literacy development	Educational Psychology	Empirical researches	Not specific	2006-2018	JARS	Not specific	Systematic Review	Qualitative
Hsieh & Li (2024)	2024	Taiwan	Systematic Review	1950 studies	Mixed	Mindfulness, bibliometrics, knowledge mapping	Clinical Psychology	Different researches	PRISMA	2012-2022	PRISMA guidelines	VOSviewer	Systematic Review PRISMA	Qualitative and Quantitative
Hu et al. (2022)	2022	China	Systematic Review	26 studies	Adults	Cognitive processing, eye-tracking	Educational Psychology	Empirical researches	Cooper’s (2016)	1981-2021	Not specific	Not specific	Systematic Review	Qualitative
Jebb et al. (2021)	2021	USA	Systematic Review	40 studies	Adults	Likert scales, psychometrics	Quantitative Psychology	Empirical researches	PRISMA	1995–2019	PRISMA guidelines	Not specific	Systematic review PRISMA	Qualitative
Ji et al. (2022)	2022	China	Systematic Review	76 studies	Mixed	Foreign language listening anxiety	Educational Psychology	Empirical researches	PRISMA	1986-2021	PRISMA guidelines	Not specific	Systematic review PRISMA	Qualitative
Kobal Grum & Babnik (2022)	2022	Slovenia	Systematic Review	67 studies	Adults	Social sustainability	Social Psychology	Different researches	PRISMA	2016-2022	PRISMA guidelines	Not specific	Systematic review PRISMA	Qualitative
Kopp et al. (2017)	2017	Germany, Switzerland	Systematic Review	5 studies	Adults	Motivational interviewing, periodontal health	Clinical Psychology	Empirical researches	PRISMA/PROSPERO/PICOS	2009-2016	Cochrane	Not specific	Systematic review PRISMA	Qualitative
Kotera & Van Gordon (2021)	2021	UK	Systematic Review	10 studies	Adults	Self-compassion, work well-being	Social Psychology	Empirical researches	PRISMA/PICOS	2014-2019	Newcastle-Ottawa Scale/Quality Assessment Table of Randomized Controlled Trials	Not specific	Systematic review PRISMA	Qualitative
Kritikou & Giovazolias (2022)	2022	Greece	Systematic Review	41 studies	Adults	Emotion regulation, academic resilience	Educational Psychology	Empirical researches	PRISMA	up to 2022	Mixed Methods Appraisal Tool (MMAT)	Not specific	Systematic review PRISMA	Qualitative
Kuznetsova et al. (2024)	2024	Canada, Finland, Russia	Systematic Review	104 studies	Youth	Giftedness	Educational Psychology	Empirical researches	PRISMA	up to 2022	PRISMA guidelines	Not specific	Systematic review PRISMA	Qualitative
Lauder et al. (2022)	2022	UK	Systematic Review	143 studies	Adults	Interventions, work performance	Clinical Psychology	Empirical researches	PRISMA/PROSPERO/PICOS	up to 2022	EPPI Reviewer	EPPI Reviewer	Systematic review PRISMA	Qualitative
Lea et al. (2019)	2019	UK	Systematic Review	45 studies	Mixed	Emotional intelligence, stres	Social Psychology	Empirical researches	PRISMA	1990-2018	Effective Public Health Practice Project Quality Assessment Tool for Quantitative Studies	Not specific	Systematic Review PRISMA	Qualitative
Léger-Goodes et al. (2022)	2022	Canada	Systematic Review	18 articles	Youth	Eco-anxiety, emotional response	Social Psychology	Empirical researches	PRISMA	2000-2021	PRISMA guidelines	Mendeley/Covidence	Systematic review PRISMA	Qualitative
Lembke et al. (2024)	2024	Germany	Systematic Review	41 studies	Youth	Trauma-sensitive education, refugee students	Educational Psychology	Empirical researches	PRISMA	Up to 2023	ROBINS-I/ CASP Qualitative Studies Checklist	Not specific	Systematic Review PRISMA	Qualitative
Lentz et al. (2021)	2021	Canada	Systematic Review	32 studies	Adults	Moral injury, moral distress	Social Psychology	Empirical researches	PRISMA	1993-2020	PRISMA guidelines	Word	Systematic review PRISMA	Qualitative
Li & Jiang (2021)	2021	China	Systematic Review	1708 articles	Not specific	Big Data in education, teacher psychology	Educational Psychology	Different researches	Not specific	2006-2021	Not specific	CiteSpace/VOSviewer	Systematic Review	Bibliometric analysis
Li & Yu (2023)	2023	China	Systematic Review	35 studies	Youth	Metaverse, digital literacy, virtual learning environments	Educational Psychology	Different researches	PRISMA/STARLITE	Up to 2022	PRISMA guidelines	VOSviewer	Systematic Review PRISMA	Qualitative
Limone & Toto (2022)	2022	Italy	Systematic Review	7 studies	Youth	Digital technology, emotional well-being	Health Psychology	Empirical researches	PRISMA	2017-2022	Cochrane/Agency for Healthcare Research and Quality (AHRQ)	ROBINS-I	Systematic review PRISMA	Qualitative
Lisboa et al. (2024)	2024	Portugal, Spain	Systematic Review	5 studies	Youth	Pro-environmental behavior, emotional intelligence	Social Psychology	Empirical researches	PRISMA/PROSPERO	2014-2020	PRISMA guidelines	Excel	Systematic review PRISMA	Qualitative
Liu (2021)	2021	China	Systematic Review	30 studies	Mixed	Teacher immediacy, motivation	Educational Psychology	Empirical researches	PRISMA	up to 2021	PRISMA guidelines	Not specific	Systematic review PRISMA	Qualitative
Liu et al. (2024)	2024	Malaysia, Thailand	Systematic Review	23 studies	Youth	Smartphone addiction, exercise intervention	Educational Psychology	Empirical researches	PRISMA/PROSPERO/PICO	Up to 2021	QualSyst	Endnote	Systematic Review PRISMA	Qualitative
Lo & Hew (2021)	2021	China	Systematic Review	33 studies	Mixed	Student Engagement	Educational Psychology	Empirical researches	PRISMA	2011-2020	PRISMA guidelines	Not specific	Systematic review PRISMA	Qualitative and quantitative
Lopes et al. (2018)	2018	Portugal	Systematic Review	16 studies	Youth	Video Game Interventions	Health Psychology	Empirical researches	PRISMA	up to 2018	Cochrane	Not specific	Systematic review PRISMA	Qualitative
Madni et al. (2022)	2022	Malaysia, Saudi Arabia, Pakistan, Mexico	Systematic Review	23 studies	Youth	E-learning, digital transformation	Educational Psychology	Different researches	PRISMA	2016-2021	PRISMA guidelines	Not specific	Systematic Review PRISMA	Qualitative
Maier et al. (2023)	2023	Austria, Germany, Norway	Systematic Review	37 studies	Mixed	Teacher emotions	Educational Psychology	Empirical researches	PRISMA	2000-2020	PRISMA guidelines	Not specific	Systematic review PRISMA	Qualitative
Maldonado Briegas et al. (2020)	2020	Spain	Systematic Review	16 studies	Adults	Memory, cognitive development, longevity	Health Psychology	Empirical researches	Not specific	2008-2017	Not specific	Not specific	Systematic Review	Qualitative and Quantitative
Manjarres et al. (2023)	2023	Colombia	Systematic Review	340 studies	Mixed	Emotional skills	Social Psychology	Different researches	Zupic and Čater (2015)	2000-2022	Not specific	Bibliometrix/Gephi/R	Bibliometric Analysis	Qualitative and quantitative
McLean et al. (2022)	2022	Australia	Systematic Review	72 studies	Mixed	Eating disorders	Clinical Psychology	Different researches	PRISMA/PROSPERO/PICOS	up to 2019	Mixed Methods Appraisal Tool (MMAT)	Covidence/EndNote	Systematic review PRISMA	Qualitative
Meixner & Kotrschal (2022)	2022	Austria	Systematic Review	18 studies	Youth	Dog-assisted interventions, cognitive skills, stress reduction	Educational Psychology	Empirical researches	PRISMA/PICO	Up to 2021	ROBINS-I/Cochrane	Not specific	Systematic review PRISMA	Qualitative
Mendonça et al. (2022)	2022	Brazil	Systematic Review	23 studies	Adults	Episodic memory	Clinical Psychology	Empirical researches	PRISMA	2002-2018	Newcastle Ottawa Scale	Not specific	Systematic review PRISMA	Quantitative
Metzner et al. (2022)	2022	Germany, South Africa	Systematic Review	34 studies	Youth	Discrimination, racism	Developmental Psychology	Empirical researches	PRISMA/PROSPERO/PICOS	1998-2021	Mixed Methods Appraisal Tool (MMAT)	EndNote	Systematic review PRISMA	Qualitative and Quantitative
Meyerhofer-Parra & González-Martínez (2023)	2023	Spain	Systematic Review	51 studies	Youth	Transmedia storytelling, neural networks	Educational Psychology	Empirical researches	PRISMA	2013-2021	PRISMA guidelines	Not specific	Systematic review PRISMA	Qualitative
Midgley et al. (2021)	2021	UK	Systematic Review	82 studies	Youth	Psychodynamic psychotherapy, mental health, clinical settings	Clinical Psychology	Empirical researches	PRISMA	2017-2020	PRISMA guidelines	Not specific	Systematic review PRISMA	Qualitative
Molina et al. (2023)	2023	Mexico	Systematic Review	50 studies	Mixed	Cognition, integrative complexity	Educational Psychology	Different researches	PRISMA/PICOS	2012-2021	PRISMA guidelines	Atlas.ti	Systematic review PRISMA	Qualitative
Mölsä et al. (2022)	2022	Finland, Israel	Systematic Review	52 studies	Youth	Social interactions	Educational Psychology	Empirical researches	PRISMA	2002-2020	CREMAS	Not specific	Systematic review PRISMA	Qualitative and Quantitative
Moula et al. (2022)	2022	UK	Systematic Review	11 studies	Youth	Nature connection	Health Psychology	Empirical researches	PRISMA/PROSPERO/PICOS	up to 2021	Cochrane/ROBIS	Covidence/Zotero	Systematic review PRISMA	Qualitative and quantitative
Mutaf-Yıldız et al. (2020)	2020	Belgium	Systematic Review	37 studies	Children	Math, Numeracy	Educational Psychology	Empirical researches	PRISMA	1997-2019	PRISMA guidelines	Not specific	Systematic review PRISMA	Qualitative and quantitative
Nogueira et al. (2022)	2022	Portugal	Systematic Review	25 studies	Adults	Cognitive reserve, aging, cognitive functioning	Cognitive Psychology	Empirical researches	PRISMA	2018-2021	PRISMA guidelines	Not specific	Systematic review PRISMA	Qualitative
Orth et al. (2022)	2022	South Africa	Systematic Review	97 studies	Youth	Mental well-being	Developmental Psychology	Empirical researches	PRISMA/PROSPERO/PICOS	2000-2020	SFS scoring system version D	Mendeley/Excel	Systematic review PRISMA	Qualitative
Parveen et al. (2022)	2022	China, Saudi Arabia, Iran	Systematic Review	41 studies	Youth	Leadership challenges, COVID-19, educational governance	Social Psychology	Empirical researches	PRISMA	2020-2021	PRISMA guidelines	Excel	Systematic review PRISMA	Qualitative and Quantitative
Peng et al. (2021)	2021	China	Systematic Review	25 studies	Mixed	Time perspective	Social Psychology	Empirical researches	PRISMA	up to 2020	Not specific	R	Systematic review PRISMA	Quantitative
Pereira & Freire (2021)	2021	Portugal	Systematic Review	13 studies	Youth	Positive youth development	Developmental Psychology	Empirical researches	PRISMA	up to 2020	Quality Assessment for Diverse Studies	Not specific	Systematic review PRISMA	Qualitative
Pereira et al. (2018)	2018	Portugal	Systematic Review	16 studies	Youth	Executive functions	Developmental Psychology	Empirical researches	PRISMA	up to 2016	Cochrane	Not specific	Systematic review PRISMA	Qualitative
Pérez-Fernández et al. (2021)	2021	Spain	Systematic Review	12 studies	Adults	Emotional intelligence	Health Psychology	Empirical researches	Not specific	up to 2021	Mixed Methods Appraisal Tool (MMAT)	Not specific	Systematic review PRISMA	Qualitative
Petersen et al. (2019)	2019	UK	Systematic Review	23 studies	Children	Mental health	Health Psychology	Empirical researches	PRISMA/PROSPERO	1998-2017	GRoLTS	Not specific	Systematic review PRISMA	Qualitative and quantitative
Petre et al. (2024)	2024	Romania, Poland	Systematic Review	19 studies	Adults	Internet-based therapy, anxiety, depression	Clinical Psychology	Empirical researches	PRISMA/PROSPERO/PICOS	2011-2023	Cochrane	Mendeley/Covidence	Systematic review PRISMA	Qualitative
Piccolo et al. (2024)	2024	Italy	Systematic Review	10 studies	Youth	Parental involvement, robot-assisted therapy, rehabilitation	Developmental Psychology	Empirical researches	PRISMA	2020-2023	PRISMA guidelines	Not specific	Systematic review PRISMA	Qualitative
Pilch et al. (2023)	2023	Poland	Systematic Review	417 studies	Adults	Conspiracy beliefs	Social Psychology	Empirical researches	PRISMA	2018-2021	PRISMA guidelines	Not specific	Systematic review PRISMA	Qualitative
Preciado et al. (2019)	2019	Spain, Colombia	Systematic Review	94 studies	Adults	Observational methodology, game analysis	Social Psychology	Empirical researches	PRISMA	1996-2018	PRISMA guidelines	Not specific	Systematic review PRISMA	Qualitative and Quantitative
Prins et al. (2022)	2022	Netherlands	Systematic Review	28 studies	Children	Nature play, cognitive development, social interactions	Educational Psychology	Empirical researches	PRISMA	1995-2022	PRISMA guidelines	Not specific	Systematic review PRISMA	Qualitative
Provenzi et al. (2020)	2020	Italy	Systematic Review	10 studies	Children	Parent-infant interaction	Developmental Psychology	Empirical researches	Not specific	1988-2018	Quality Assessment Tool for Quantitative Studies	EndNote	Systematic review	Qualitative
Queiruga-Dios et al. (2021)	2021	Spain, Colombia	Systematic Review	120 studies	Youth	Service-learning, community engagement, assessment methods	Educational Psychology	Different researches	PRISMA	1990-2019	PRISMA guidelines	Not specific	Systematic review PRISMA	Qualitative
Quintero et al. (2019)	2019	Colombia, Spain	Systematic Review	50 studies	Youth	AR in education	Educational Psychology	Different researches	PRISMA	2008-2018	QUORUM	Not specific	Systematic review PRISMA	Qualitative
Rossignoli-Palomeque et al. (2018)	2018	Spain	Systematic Review	70 studies	Youth	Brain training, cognitive transfer	Educational Psychology	Empirical researches	PRISMA	Up to 2017	PRISMA guidelines	Not specific	Systematic review PRISMA	Qualitative
Sáiz-Manzanares et al. (2022)	2022	Spain	Systematic Review	30 studies	Mixed	Behavioral patterns	Quantitative Psychology	Empirical researches	PRISMA	2018-2021	PRISMA guidelines	Atlas.ti/SPSS/Orange	Systematic review PRISMA	Qualitative and quantitative
Salehzadeh & Ziaeian (2024)	2024	Iran	Systematic Review	180 studies	Mixed	Decision-making	Social Psychology	Different researches	PRISMA	up to 2023	PRISMA guidelines	Mendeley/CiteSpace/VosViewer	Systematic review PRISMA	Qualitative and quantitative
Sanabria-Mazo et al. (2023)	2023	Spain	Systematic Review	13 studies	Adults	Cognitive Behavioral Therapy (CBT), Acceptance and Commitment Therapy (ACT)	Clinical Psychology	Empirical researches	PRISMA/PROSPERO/PICOS	2011-2023	Cochrane	Mendeley/Rayyan	Systematic review PRISMA	Qualitative and Quantitative
Sankalaite et al. (2021)	2021	Belgium, Netherlands	Systematic Review	12 studies	Children	Executive functions, self-regulation, teacher-student interaction	Educational Psychology	Empirical researches	PROSPERO	Up to 2021	Not specific	Not specific	Systematic review	Qualitative
Schiera et al. (2024)	2024	Italy	Systematic Review	81 studies	Youth	Psychophysical well-being, COVID-19, learning loss	Educational Psychology	Empirical researches	PRISMA	2020-2023	Consensual Quality Research	Not specific	Systematic review PRISMA	Qualitative
Shadiev & Wang (2022)	2022	China	Systematic Review	34 studies	Youth	21st-century skills	Educational Psychology	Empirical researches	PRISMA	2011-2022	PRISMA guidelines	Not specific	Systematic review PRISMA	Qualitative
Shaojie et al. (2022)	2022	China, Malaysia	Systematic Review	46 studies	Mixed	Audio-visual multimodal input, listening comprehension	Educational Psychology	Empirical researches	PRISMA	2012-2022	PRISMA guidelines	Excel	Systematic review PRISMA	Qualitative
Sharif Nia et al. (2022)	2022	Iran, USA	Systematic Review	33 studies	Mixed	Psychological hardiness	Health Psychology	Empirical researches	PRISMA	1979-2022	COSMIN	EndNote	Systematic review PRISMA	Qualitative and Quantitative
Siegel et al. (2021)	2021	Austria, Belgium, Switzerland	Systematic Review	55 studies	Adults	Legal vulnerability	Social Psychology	Different researches	PRISMA/ENTREQ	up to 2020	PRISMA guidelines	Not specific	Systematic review PRISMA	Qualitative and quantitative
Stockman et al. (2023)	2023	Belgium, USA, Netherlands	Systematic Review	46 studies	Mixed	Social ecology, trauma recovery, risk/protective factors	Clinical Psychology	Reviews	Cochrane Collaboration	Up to 2023	Cochrane	Excel	Systematic review	Qualitative
Sulla et al. (2023)	2023	Italy	Systematic Review	16 studies	Mixed	Socially shared regulation of learning, teacher-student interaction	Educational Psychology	Empirical researches	PRISMA	Up to 2022	PRISMA guidelines	Rayyan	Systematic review PRISMA	Qualitative
Tebar-Yébana et al. (2024)	2024	Spain	Systematic Review	77 studies	Adults	Educational inclusion, family satisfaction, bibliometrics	Educational Psychology	Different researches	PRISMA	Up to 2023	PRISMA guidelines	HistCite/VOSviewer/R	Systematic review PRISMA	Qualitative and Quantitative
Thakur et al. (2018)	2018	USA	Systematic Review	31 studies	Mixed	Musical abilities, cognition, neurodevelopment	Developmental Psychology	Empirical researches	PRISMA	Up to 2017	PRISMA guidelines	EndNote	Systematic review PRISMA	Qualitative
Tian et al. (2024)	2024	China, USA	Systematic Review	963 studies	Mixed	Resilience	Social Psychology	Empirical researches	PRISMA	2015-2020	PRISMA guidelines	Not specific	Systematic review PRISMA	Qualitative and quantitative
Tlili et al. (2022)	2022	China, France, Spain, USA	Systematic Review	96 studies	Mixed	Game-based learning, activity theory, gamification	Educational Psychology	Empirical researches	PRISMA	Up to 2021	PRISMA guidelines	Not specific	Systematic review PRISMA	Qualitative
Torgersen et al. (2024)	2024	Norway	Systematic Review	32 studies	Adults	Innovation, competencies	Social Psychology	Empirical researches	PRISMA/NIRO	1978-2022	PRISMA guidelines	EndNote/Covidence	Systematic review PRISMA	Qualitative
Torrijos-Muela et al. (2021)	2021	Spain	Systematic Review	24 studies	Mixed	Neuromyths, neuroeducation	Educational Psychology	Empirical researches	PRISMA/PICO	2012-2020	PRISMA guidelines	EndNote	Systematic review PRISMA	Qualitative
Toyama & Yamazaki (2021)	2021	Japan	Systematic Review	40 studies	Mixed	Foreign language anxiety, anxiety reduction	Educational Psychology	Empirical researches	PRISMA	2007-2020	PRISMA guidelines	Not specific	Systematic review PRISMA	Qualitative
Tronchoni et al. (2022)	2022	Spain	Systematic Review	45 articles	Youth	Educational effectiveness	Educational Psychology	Empirical researches	PRISMA	2012-2021	PRISMA guidelines	Not specific	Systematic review PRISMA	Qualitative and quantitative
Ugalde et al. (2021)	2021	Spain, UK	Systematic Review	17 studies	Children	Interactive learning environments, cognitive development	Educational Psychology	Empirical researches	PRISMA	2005-2020	PRISMA guidelines	Not specific	Systematic review PRISMA	Qualitative
van der Meulen et al. (2023)	2023	Spain	Systematic Review	23 studies	Youth	Emotional peer support, inclusion	Educational Psychology	Empirical researches	PRISMA	1992-2016	PRISMA guidelines	Not specific	Systematic review PRISMA	Qualitative
Varela-Moreno et al. (2022)	2022	Spain	Systematic Review	10 studies	Adults	Cognitive-behavioral therapy, psychological treatment	Clinical Psychology	Empirical researches	PRISMA/PROSPERO	1995-2020	PEDro scale	Zotero	Systematic review PRISMA	Qualitative and Quantitative
Veloso et al. (2020)	2020	Portugal	Systematic Review	22 studies	Youth	Cognitive training	Clinical Psychology	Empirical researches	PRISMA	2008-2018	Cochrane/ROBINS-I	Rayyan/Mendeley	Systematic review PRISMA	Qualitative
Velotti et al. (2018)	2018	Italy	Systematic Review	113 studies	Mixed	Attachment theory, relational violence, IPV risk factors	Social Psychology	Empirical researches	PRISMA	Up to 2018	PRISMA guidelines	Not specific	Systematic review PRISMA	Qualitative
Verschuren et al. (2021)	2021	Netherlands, Norway, Spain	Systematic Review	489 studies	Adults	Negative work behavior	Social Psychology	Different researches	PRISMA	2000-2020	PRISMA guidelines	Not specific	Systematic review PRISMA	Qualitative
Vigdal & Brønnick (2022)	2022	Norway	Systematic Review	38 studies	Mixed	Overprotective parenting	Developmental Psychology	Empirical researches	PRISMA/PROSPERO/PICOS	1985-2019	Campbell’s Validity Typology	EndNote	Systematic review PRISMA	Qualitative
Vistorte et al. (2024)	2024	Spain, Mexico, Peru	Systematic Review	41 studies	Youth	Artificial intelligence, emotion recognition	Educational Psychology	Different researches	PRISMA	Up to 2024	PRISMA guidelines	VOSviewer	Systematic review PRISMA	Qualitative
Walugembe et al. (2022)	2022	Uganda	Systematic Review	51 studies	Youth	Adaptive behaviors, COVID-19	Educational Psychology	Empirical researches	Tranfield et al. (2003)	2000-2022	Not specific	Not specific	Systematic review	Qualitative and Quantitative
Wang & Hall (2018)	2018	Canada, China	Systematic Review	79 studies	Adults	Causal attribution	Educational Psychology	Empirical researches	Not specific	up to 2018	Not specific	Not specific	Systematic review	Qualitative
Wang & Shih (2022)	2022	Taiwan	Systematic Review	92 studies	Adults	Teacher education	Educational Psychology	Different researches	Not specific	2015-2019	Not specific	Not specific	Systematic review	Qualitative
Wang & Yu (2023)	2023	China	Systematic Review	53 studies	Youth	Academic self-concept, gender differences, motivation	Educational Psychology	Different researches	PRISMA/STARLITE	2008-2022	PRISMA guidelines	VOSviewer	Systematic review PRISMA	Qualitative
Wang et al. (2023)	2023	Japan	Systematic Review	53 studies	Mixed	Fixation, creativity	Educational Psychology	Empirical researches	Not specific	up to 2023	Not specific	Not specific	Systematic review	Qualitative
Willis et al. (2019)	2019	UK	Systematic Review	20 studies	Adults	Occupational stress, well-being	Clinical Psychology	Different researches	PRISMA/SPIDER	up to 2017	Mixed Methods Appraisal Tool (MMAT)	SPSS	Systematic review PRISMA	Qualitative and quantitative
Wu & Sarker (2022)	2022	China, Malaysia	Systematic Review	23 studies	Not specific	Synergistic governance	Social Psychology	Different researches	PRISMA	2000-2022	PRISMA guidelines	Not specific	Systematic review PRISMA	Qualitative
Wu et al. (2020)	2020	Taiwan	Systematic Review	172 studies	Mixed	Remote Associates Test (RAT), creativity, cognitive processes	Cognitive Psychology	Empirical researches	Not specific	2000-2019	Not specific	Not specific	Systematic review	Qualitative
Wu et al. (2021)	2021	Canada, Taiwan	Systematic Review	25 studies	Mixed	Neuroimaging, cognitive processes	Educational Psychology	Different researches	PRISMA	2000-2019	PRISMA guidelines	Not specific	Systematic review PRISMA	Qualitative
Wu et al. (2023)	2023	China, Malaysia	Systematic Review	18 studies	Mixed	Anxiety, COVID-19	Educational Psychology	Empirical researches	PRISMA	2020-2022	PRISMA guidelines	Not specific	Systematic review PRISMA	Qualitative
Xu & Zeng (2023)	2023	China	Systematic Review	20 studies	Mixed	Feedback, L2 acquisition	Educational Psychology	Empirical researches	PRISMA	2006-2021	Kmet et al. (2004)	Not specific	Systematic review PRISMA	Qualitative
Yang et al. (2022)	2022	China	Systematic Review	31 studies	Mixed	Autonomy support, engagement	Educational Psychology	Empirical researches	PRISMA	2000-2020	PRISMA guidelines	Not specific	Systematic review PRISMA	Qualitative
Ye et al. (2024)	2024	Norway	Systematic Review	119 studies	Youth	Academic resilience, protective factors	Educational Psychology	Empirical researches	PRISMA	2000-2023	PRISMA guidelines	Not specific	Systematic review PRISMA	Qualitative
Yu (2023)	2023	China	Systematic Review	62 studies	Youth	Neuroscience, mathematical anxiety	Cognitive Psychology	Different researches	PRISMA/ESSA	Up to 2023	PRISMA guidelines	Not specific	Systematic review PRISMA	Qualitative
Yu (2024)	2024	China	Systematic Review	49 studies	Mixed	Foreign language anxiety	Educational Psychology	Empirical researches	PRISMA	2004-2023	PRISMA guidelines	Not specific	Systematic review PRISMA	Qualitative
Zhao & Wang (2023)	2023	New Zealand	Systematic Review	32 studies	Youth	Perseverance, interest	Educational Psychology	Empirical researches	Zawacki-Richter et al. (2020)	2017-2022	Not specific	SPSS/AMOS/Mplus	Systematic review	Qualitative
